# Supplementary material for: Diagnostic Performance of On-Site Computed Tomography Derived Fractional Flow Reserve on Non-Culprit Coronary Lesions in Patients with Acute Coronary Syndrome
Source: MDPI journal article supplement (doi:10.3390/life12111820), 2022-11-08
Supplement: s1 [file s1]

## ***Supplementary Materials***

### **Detailed description of dobutamine stress echocardiography protocol**

**Rationale behind the use of the 16-segment ventricular model during the procedure:** The imperceptible nature of the endocardial excursion and the thickening of the tip of the apex.

**Dobutamine infusion protocol:** Titrated in 3-minute intervals from 5 to 10, 20, 30, 40 or 50 µg/kg/minute.

**Atropine:** Intravenous administration up to 2 mg (only if age-predicted submaximal heart frequency was not achieved).

**Contrast agent:** Intravenous administration, Sonovue (Bracco, Italy). Only in patients with poor image quality.

**Definition of ischemia during the procedure:** New or worsening wall motion abnormality in  $\geq 2$  contiguous myocardium segments, as well as biphasic response.

**Endpoints other than ischemia:** Maximum dose of pharmacological agents; Achievement of at least age-predicted submaximal (85%) target heart rate; Severe chest pain; Ventricular tachycardia/fibrillation; Patient's request.

### **Coronary supplying areas**

Left anterior descending artery: apical septal; mid. inferoseptal; apical, mid, and basal anterior; apical lateral; apical inferior; mid. and basal anteroseptal.

Left circumflex artery (right dominance): mid. and basal anterolateral.

Left circumflex artery (left dominance): mid. and basal inferolateral; mid. and basal inferior; basal inferoseptal; mid. and basal anterolateral.

Right coronary artery (right dominance): mid. and basal inferolateral; mid. and basal inferior; basal inferoseptum.

## Supplementary Materials

Right coronary artery in the case of left dominance: 0 segment in the case of left dominance.

**Segmental scores:** 1=normokinesia; 2=hypokinesia; 3=akinesia; 4=dyskinesia; 0=not adequately visible segment.

**Interpretation of the images:** By two independent echocardiographer. In cases of discordant result, final decision has been made by the expert echocardiographer (Peter Andrassy)

**Supplementary Table S1** Invasive characteristics of the investigated non-culprit lesions.

|                                                                           | <b>N=89</b> |
|---------------------------------------------------------------------------|-------------|
| LAD (N, %)                                                                | 52 (58.4)   |
| LCx (N, %)                                                                | 15 (16.9)   |
| RCA (N, %)                                                                | 22 (24.7)   |
| Right dominance (N, %)                                                    | 61 (89.7)   |
| MLDS% by QCA (%, at the time of the primary PCI)                          | 51.0±8.1    |
| MLDS% by QCA (%, at the time of the staged invasive coronary angiography) | 44.9±8.2    |
| FFRi value                                                                | 0.83±0.08   |
| FFRi determined as positive (N, %)                                        | 35 (39.3)   |
| NCLs with LVEF<50% (N,%)                                                  | 43 (48.3)   |

**Abbreviations:** FFRi – invasive fractional flow reserve; LAD – left anterior descending coronary artery; LCx – left circumflex coronary artery; LVEF – left ventricular ejection fraction; MLDS% - degree of minimal lumen diameter stenosis in percentages; NCL – non-culprit lesion; QCA – quantitative coronary angiography; RCA – right coronary artery

**Supplementary Table S2** Baseline global and regional echocardiographic findings at rest and at peak stress, respectively.

| <b>Global (patient-based) parameters</b>  | <b>N=68</b> |
|-------------------------------------------|-------------|
| WMA at rest (N, %)                        | 56 (82.4)   |
| Global WMSI at rest                       | 1.27±0.21   |
| Global WMSI at peak stress                | 1.34±0.28   |
| Global $\Delta$ WMSI                      | 0.06±0.27   |
| Contrast enhancement (N, %)               | 2 (2.9)     |
| Heart rate at rest (1/min)                | 65.1±8.8    |
| Heart rate at peak stress (1/min)         | 147.7±10.1  |
| Target heart rate achieved (N, %)         | 63 (92.6)   |
| <b>Regional (vessel-based) parameters</b> | <b>N=89</b> |
| Regional WMSI at rest                     | 1.06±0.18   |
| Regional WMSI at peak stress              | 1.31±0.50   |
| Regional $\Delta$ WMSI                    | 0.25±0.47   |
| DSE determined as positive (N, %)         | 27 (30.3)   |

**Abbreviations:** DSE – dobutamine stress echocardiography; WMA – wall motion abnormality; WMSI – wall motion score index;  $\Delta$ WMSI – the difference between rest and peak wall motion score index (rest minus peak)

**Supplementary Table S3** 2 by 2 contingency table of CT-FFR measurement compared with FFRi (Panel A) and DSE (Panel B).

Overall, CT-FFR showed a moderate match with FFRi ( $\chi^2=17.527$ ,  $p<0.001$ ; kappa=0.427,  $p<0.001$ ); however, it did not have any association with DSE ( $\chi^2=1.996$ ,  $p=0.158$ ; kappa=0.149,  $p=0.158$ ).

**Panel A**

|          | FFRi + | FFRi - |      |
|----------|--------|--------|------|
| CT-FFR + | 18     | 6      | 24   |
| CT-FFR - | 17     | 48     | 65   |
|          | 35     | 54     | N=89 |

**CT-FFR versus FFRi:** accuracy: 74% (95% CI: 64%-83%); sensitivity: 51% (95% CI: 34%-69%); specificity: 89% (95% CI: 77%-96%); PPV: 75% (95% CI: 57%-87%); NPV: 74% (95% CI: 66%-80%); PLR: 4.6 (95% CI: 2.0-10.5); NLR: 0.55 (95% CI: 0.38-0.78)

**Panel B**

|          | DSE + | DSE - |    |
|----------|-------|-------|----|
| CT-FFR + | 10    | 14    | 24 |

## Supplementary Materials

|          |    |    |      |
|----------|----|----|------|
| CT-FFR - | 17 | 48 | 65   |
|          | 27 | 62 | N=89 |

**CT-FFR versus DSE:** accuracy: 65% (95% CI: 54%-75%); sensitivity: 37% (95% CI: 19%-58%); specificity: 77% (95% CI: 65%-87%); PPV: 42% (95% CI: 27%-58%); NPV: 74% (95% CI: 67%-80%); PLR: 1.64 (95% CI: 0.84-3.22); NLR: 0.81 (95% CI: 0.59-1.12)

**Abbreviations:** CI – confidence interval; CT-FFR – computed tomography-based fractional flow reserve; DSE – dobutamine stress echocardiography; FFRi – invasive fractional flow reserve; NLR – negative likelihood ratio; NPV – negative predictive value; PLR – positive likelihood ratio; PPV – positive predictive value

**Supplementary Table S4** 2 by 2 contingency table of CT-FFR measurement relative to FFRi in the subgroups according to ACS type (STEMI: Panel A; NSTEMI-ACS: Panel B).

**Panel A**

|          | FFRi + | FFRi - |      |
|----------|--------|--------|------|
| CT-FFR + | 12     | 4      | 16   |
| CT-FFR - | 8      | 33     | 41   |
|          | 20     | 37     | N=57 |

**CT-FFR in STEMI:** accuracy: 79% (95% CI: 66%-89%); sensitivity: 60% (95% CI: 36%-81%); specificity: 89% (95% CI: 75%-97%); PPV: 75% (95% CI: 53%-89%); NPV: 80% (95% CI: 70%-88%); PLR: 5.55 (95% CI: 2.06-14.97); NLR: 0.45 (95% CI: 0.26-0.78)

**Panel B**

|          | DSE + | DSE - |    |
|----------|-------|-------|----|
| CT-FFR + | 6     | 2     | 8  |
| CT-FFR - | 9     | 15    | 24 |

|  |    |    |      |
|--|----|----|------|
|  | 15 | 17 | N=32 |
|--|----|----|------|

**CT-FFR in NSTE-ACS:** accuracy: 66% (95% CI: 47%-81%); sensitivity: 40% (95% CI: 16%-68%); specificity: 88% (95% CI: 64%-99%); PPV: 75% (95% CI: 42%-93%); NPV: 63% (95% CI: 52%-72%); PLR: 3.40 (95% CI: 0.80-14.38); NLR: 0.68 (95% CI: 0.43-1.06)

**Abbreviations:** CI – confidence interval; CT-FFR – computed tomography-based fractional flow reserve; FFRi – invasive fractional flow reserve; NLR – negative likelihood ratio; NPV – negative predictive value; NSTEMI – Non-ST-elevation acute coronary syndrome; PLR – positive likelihood ratio; PPV – positive predictive value; STEMI – ST-elevation myocardial infarction **Supplementary Table S5** Correlation analysis of CCTA-based anatomical and functional parameters (row) with FFRi and regional WMSI at peak stress during DSE (column).

|                              | Lesion length |       | MLDS% |       | CT-FFR value |        | CT-FFR drop |        |
|------------------------------|---------------|-------|-------|-------|--------------|--------|-------------|--------|
|                              | r             | P     | r     | p     | r            | p      | r           | p      |
| FFRi value                   | -0.09         | 0.402 | -0.26 | 0.015 | 0.54         | <0.001 | -0.54       | <0.001 |
| Regional WMSI at peak stress | -0.08         | 0.478 | -0.16 | 0.139 | -0.05        | 0.622  | 0.04        | 0.715  |

**Abbreviations:** CCTA – coronary computed tomography angiography; CT-FFR – computed tomography-based fractional flow reserve; CT-FFR drop – CT-FFR value difference between proximal and distal measuring point (proximal minus distal); FFRi – invasive fractional flow reserve; MLDS% - degree of minimal lumen diameter stenosis in percentages; WMSI – wall motion score index



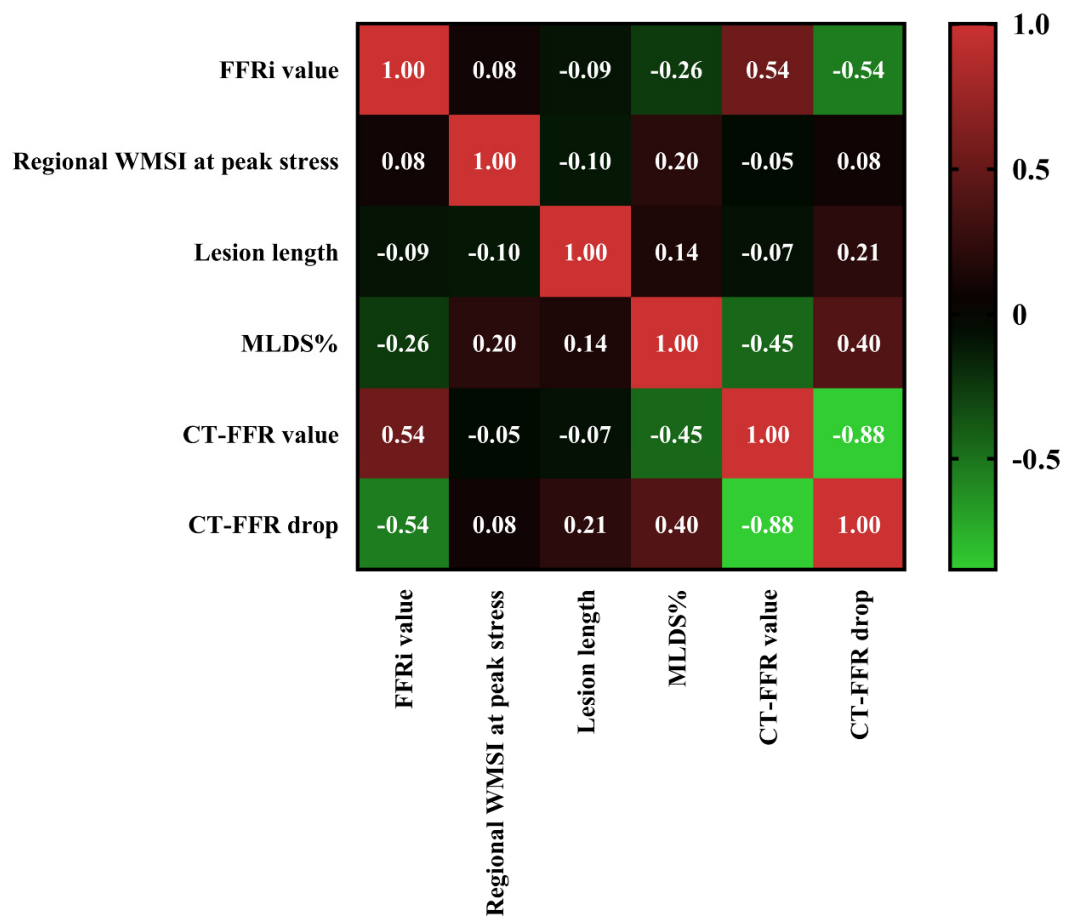

**Supplementary Figure S1** Correlation analysis between multimodal functional (CCTA, FFRi and DSE) parameters: a heatmap.

**Abbreviations:** CCTA – coronary computed tomography angiography; CT-FFR – computed tomography-based fractional flow reserve; CT-FFR drop – CT-FFR value difference between proximal and distal measuring point (proximal minus distal); DSE – dobutamine stress echocardiography; FFRi – invasive fractional flow reserve; MLDS% - degree of minimal lumen diameter stenosis in percentages; WMSI – wall motion score index
